# Supplementary material
Source: Springer Nature journal article supplement (https://www.springermedizin.de/resource/supplementary/12995_2012_239_MOESM3_ESM.pdf/9622974)

# Muscle group

Frequency, Hz

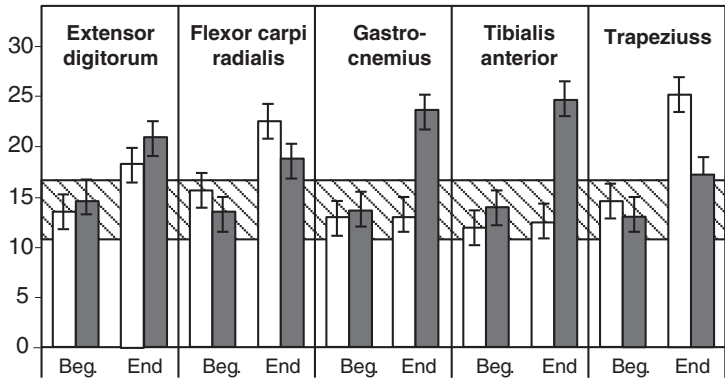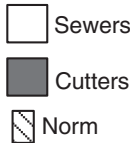

Supplement: MOESM3 [file 9622974]
